# Supplementary material for: Interface engineering and oxygen vacancies derived from plasma-treated Cu2O synergistically enhancing electrocatalytic CO2-to-C2+ conversion
Source: Royal Society of Chemistry journal article supplement (doi:10.1039/d4ta03492a), 2024-01-01
Supplement: d4ta03492a1.pdf [file d4ta03492a1.pdf]

## Interface Engineering and Oxygen Vacancy Derived from Plasma-treated Cu<sub>2</sub>O Synergistically Enhancing Electrocatalytic CO<sub>2</sub>-to-C<sub>2+</sub> Conversion

*Lei Wang,<sup>1,2Δ</sup> Xue Yao,<sup>3Δ</sup> Subhajit Jana,<sup>1Δ</sup> Yongzan Zhou,<sup>1Δ</sup> Chunlan Qin,<sup>4</sup> Hongwei Shou,<sup>4</sup> Youchao Teng,<sup>1</sup> Ning Chen,<sup>5</sup> Lidong Zhang,<sup>3</sup> Chandra Veer Singh,<sup>3,6\*</sup> Zhongchao Tan,<sup>1,7\*</sup> Yimin A. Wu<sup>1,2,8\*</sup>*

<sup>1</sup>Department of Mechanical and Mechatronics Engineering, University of Waterloo, Waterloo, Ontario N2L 3G1, Canada

<sup>2</sup>Waterloo Institute for Nanotechnology, University of Waterloo, Waterloo, Ontario N2L 3G1, Canada

<sup>3</sup>Department of Materials Science and Engineering, University of Toronto, Toronto, Ontario M5S 3E4, Canada

<sup>4</sup>National Synchrotron Radiation Laboratory, University of Science and Technology of China, Hefei 230029, P. R. China;

<sup>5</sup>Canadian Light Source, Saskatoon, SK S7N 2V3, Canada

<sup>6</sup>Department of Mechanical and Industrial Engineering, University of Toronto, Toronto, Ontario M5S 3G8, Canada

<sup>7</sup>Eastern Institute of Technology, No. 568 Tongxin Road, Zhenhai District, Ningbo, Zhejiang, 315200, China

<sup>8</sup>Department of Chemistry, University of Waterloo, Waterloo, Ontario N2L 3G1, Canada

<sup>Δ</sup> Equal contributions

\* Corresponding emails: [chandraveer.singh@utoronto.ca](mailto:chandraveer.singh@utoronto.ca); [ztan@eitech.edu.cn](mailto:ztan@eitech.edu.cn); [yimin.wu@uwaterloo.ca](mailto:yimin.wu@uwaterloo.ca)

**This supplementary information includes: Figure S1 to S12 and Table S1-3.**

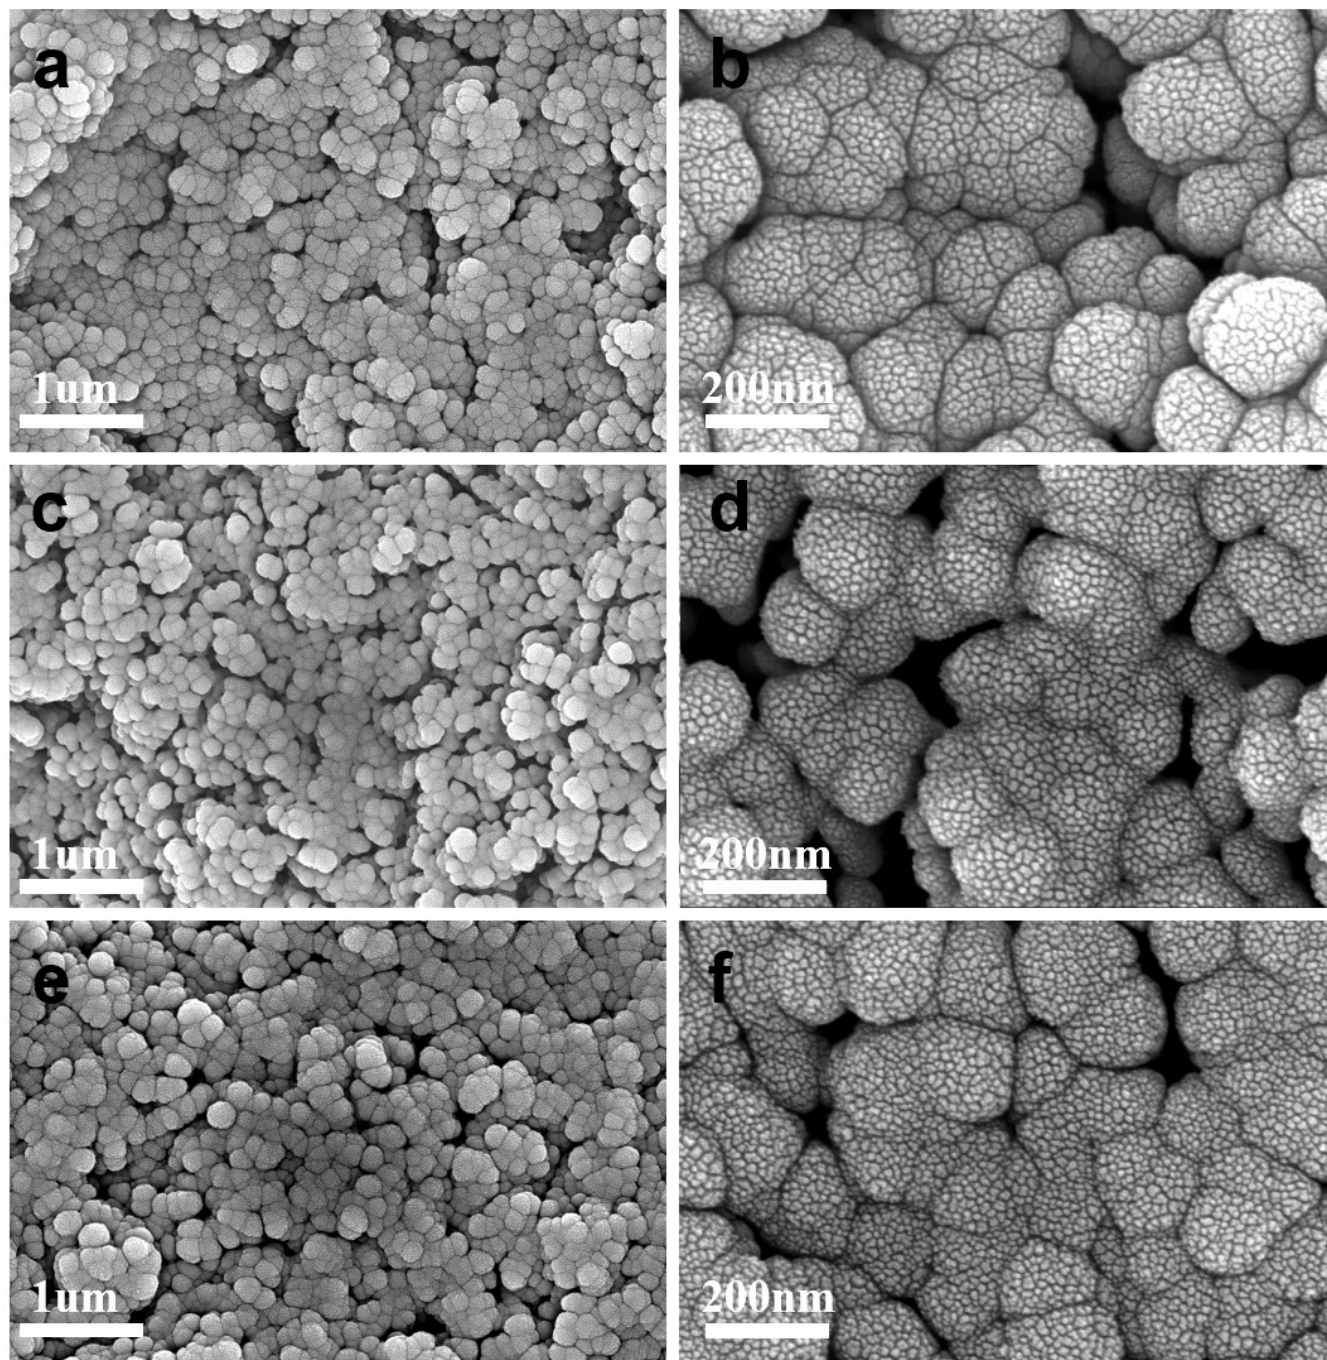

**Figure S1.** (a-f) SEM images of Cu<sub>2</sub>O (a-b), Cu<sub>2</sub>O-Ar/H<sub>2</sub> (c-d) and Cu<sub>2</sub>O-Ar/O<sub>2</sub> (e-f).

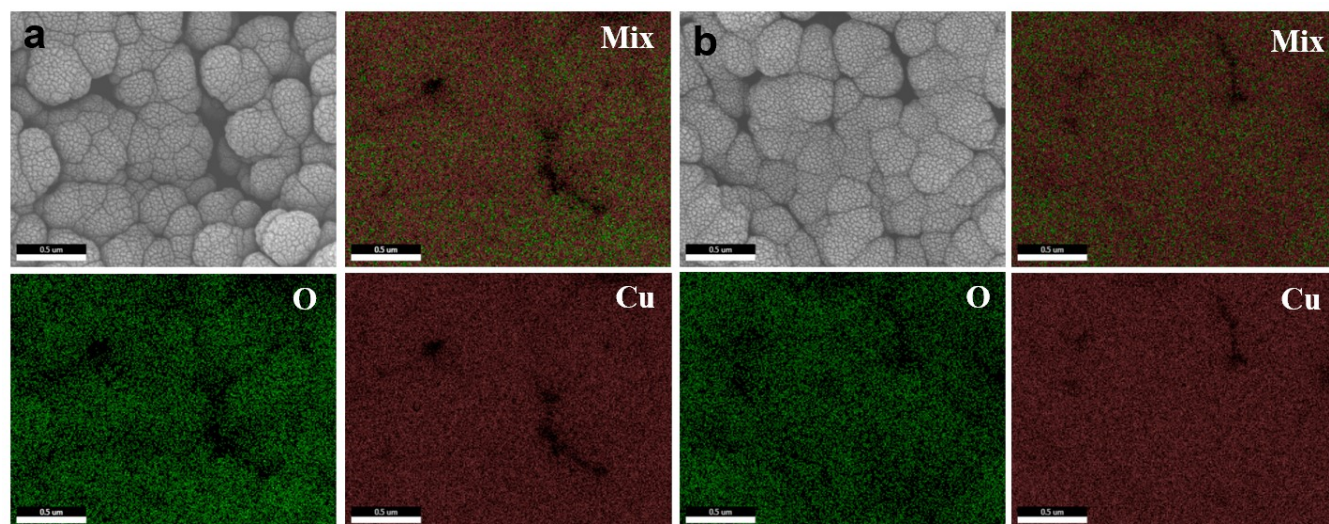

**Figure S2.** (a-b) SEM-EDS elemental mapping images of  $\text{Cu}_2\text{O}$  (a) and  $\text{Cu}_2\text{O-Ar/O}_2$  (b).

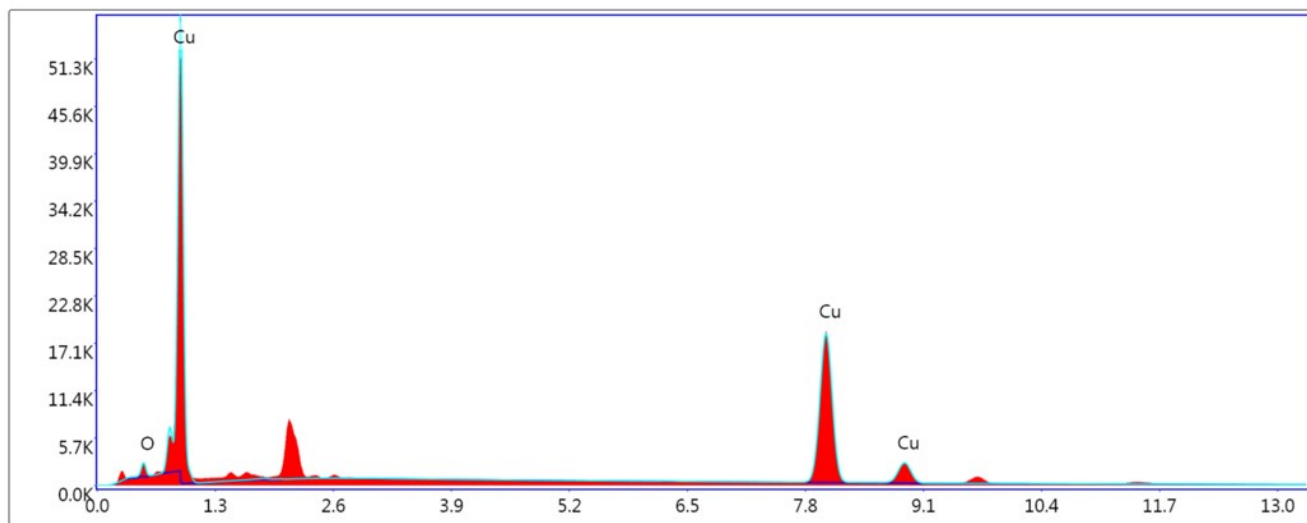

Lsec: 532.5 0 Cnts 0.000 keV Det: Octane Elect Plus

| Element | Weight % | Atomic % | Net Int. | Error % | Kratio |
|---------|----------|----------|----------|---------|--------|
| O K     | 2.50     | 9.24     | 38.90    | 9.60    | 0.0105 |
| Cu K    | 97.50    | 90.76    | 1102.10  | 1.75    | 0.9670 |

Figure S3. (a) Element content distribution of  $\text{Cu}_2\text{O-Ar/H}_2$ .

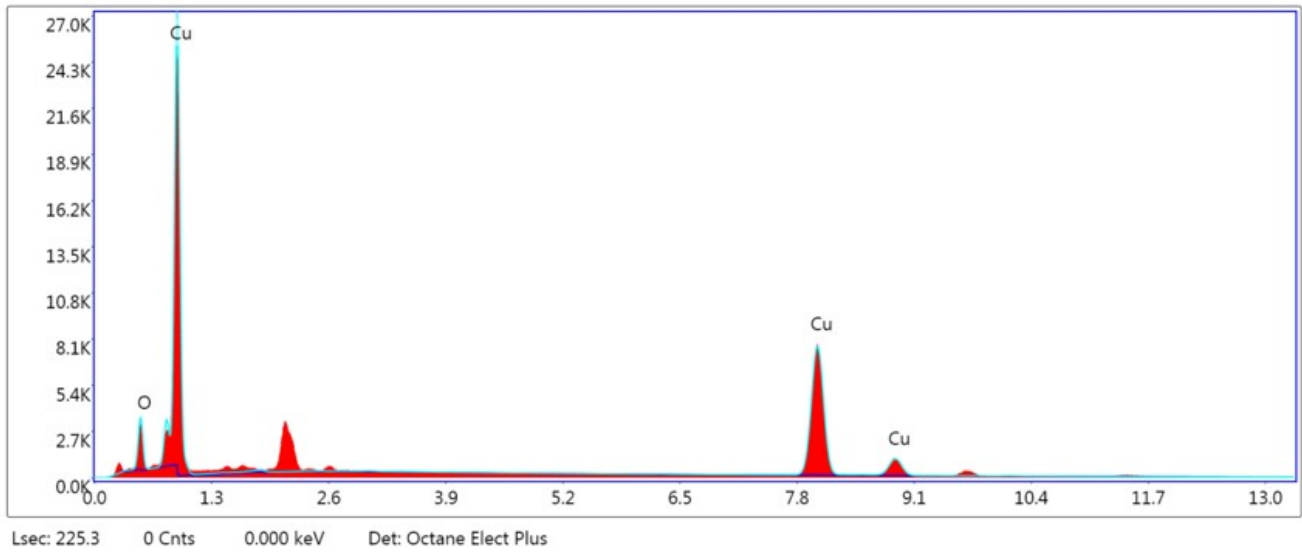

| Element | Weight % | Atomic % | Net Int. | Error % | Kratio |
|---------|----------|----------|----------|---------|--------|
| O K     | 14.56    | 40.37    | 158.20   | 8.85    | 0.0646 |
| Cu K    | 85.44    | 59.63    | 615.00   | 2.28    | 0.8151 |

**Figure S4.** (a) Element content distribution of  $\text{Cu}_2\text{O}$ .

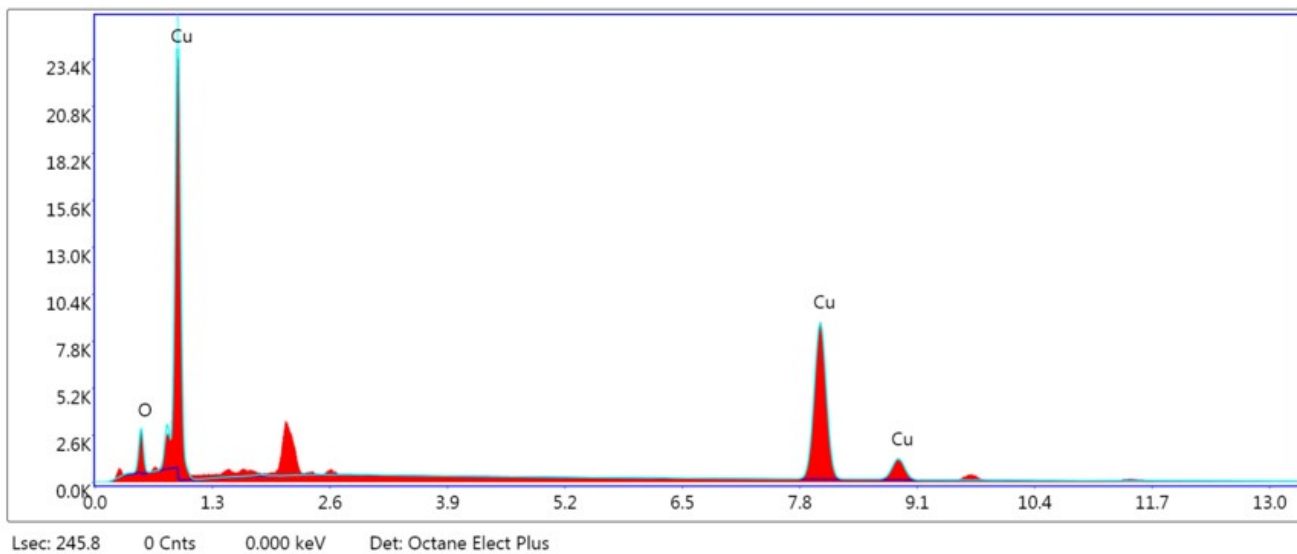

| Element | Weight % | Atomic % | Net Int. | Error % | Kratio |
|---------|----------|----------|----------|---------|--------|
| O K     | 12.07    | 35.28    | 123.40   | 9.15    | 0.0529 |
| Cu K    | 87.93    | 64.72    | 607.10   | 2.32    | 0.8456 |

**Figure S5.** (a) Element content distribution of Cu<sub>2</sub>O-Ar/O<sub>2</sub>.

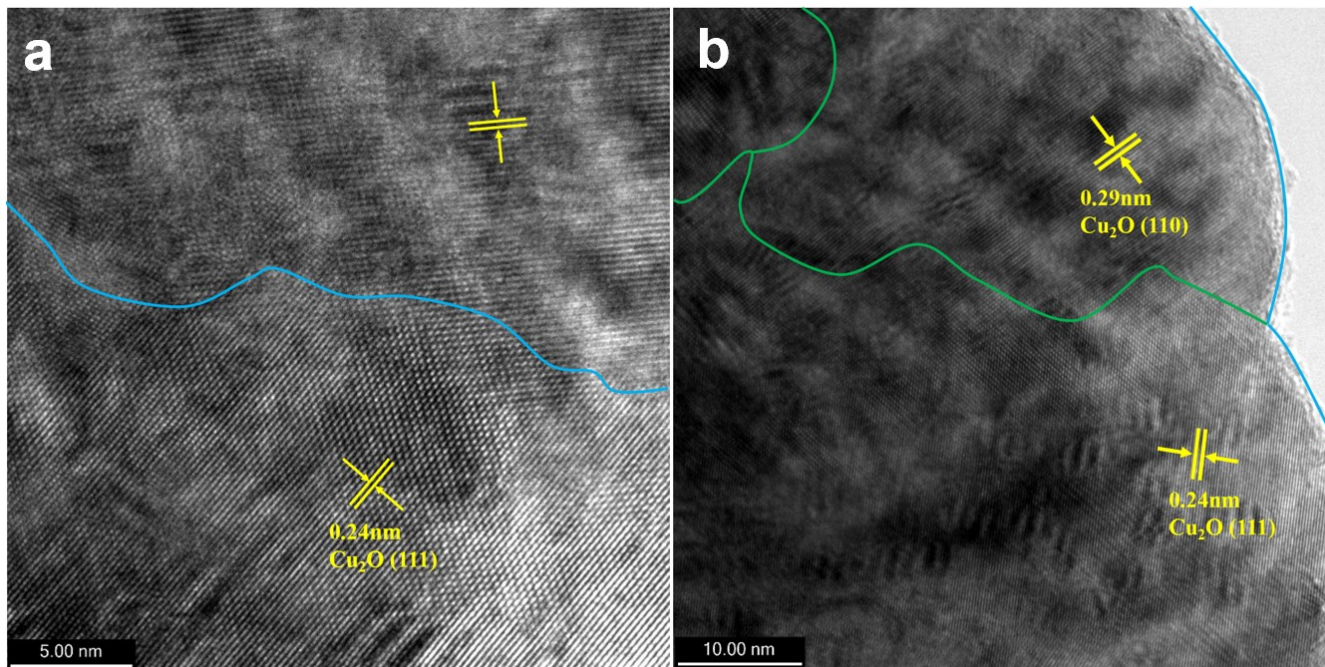

**Figure S6.** (a-b) HRTEM images of  $\text{Cu}_2\text{O}$ .

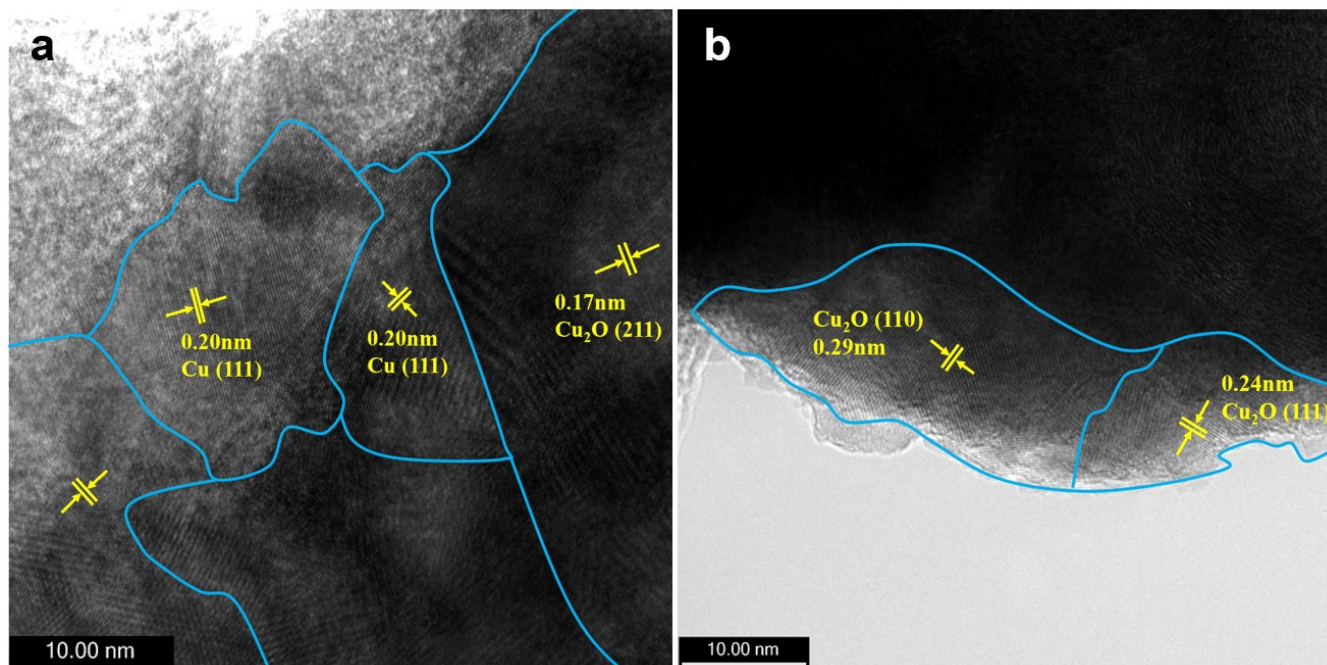

**Figure S7.** (a-b) HRTEM images of Cu<sub>2</sub>O-Ar/H<sub>2</sub> (a) and Cu<sub>2</sub>O-Ar/O<sub>2</sub> (b).



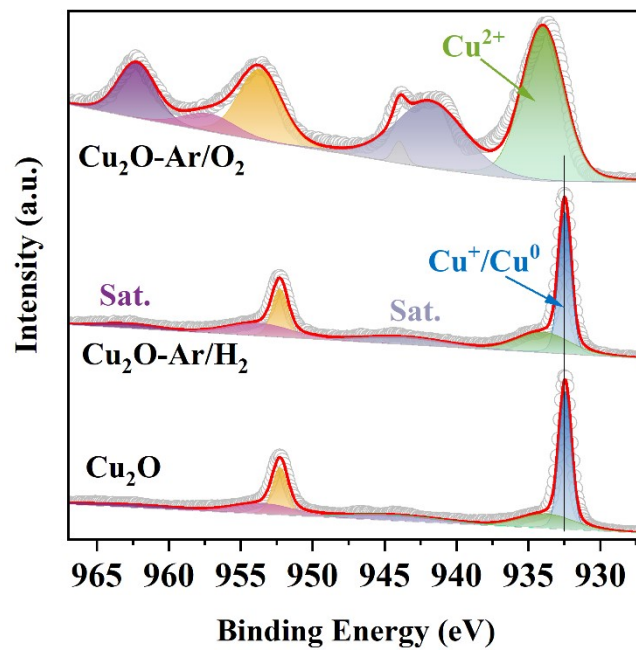

**Figure S8.** Cu 2p XPS spectra of as-prepared catalysts.

**Table S1.** Fitted EXAFS parameters at Cu K-edge for Cu<sub>2</sub>O, Cu<sub>2</sub>O-Ar/H<sub>2</sub>, Cu<sub>2</sub>O-Ar/O<sub>2</sub>, Cu<sub>2</sub>O, and CuO reference.

| Sample                                  | Path  | R-factor | N    | R (Å)      | $\sigma^2$ (Å <sup>2</sup> ) |
|-----------------------------------------|-------|----------|------|------------|------------------------------|
| <b>CuO reference</b>                    | Cu-O  | 5.1      | 4    | 1.94±0.008 | 3.8±1.0                      |
| <b>Cu<sub>2</sub>O reference</b>        | Cu-O  | 0.0244   | 2    | 1.85±0.01  | 0.003                        |
|                                         | Cu-Cu |          | 12   | 3.03±0.03  | 0.032                        |
| <b>Cu<sub>2</sub>O</b>                  | Cu-O  | 0.016    | 1.90 | 1.84±0.004 | 0.002                        |
|                                         | Cu-Cu |          | 13.1 | 3.01±0.006 | 0.032                        |
| <b>Cu<sub>2</sub>O-Ar/H<sub>2</sub></b> | Cu-O  | 0.01     | 1.77 | 1.79±0.06  | 0.0019                       |
|                                         | Cu-Cu |          | 12.0 | 2.94±0.06  | 0.019                        |
| <b>Cu<sub>2</sub>O-Ar/O<sub>2</sub></b> | Cu-O  | 0.015    | 1.65 | 1.84±0.05  | 0.001                        |
|                                         | Cu-Cu |          | 0.24 | 2.89±0.03  | 0.004                        |

N: coordination number;  $\sigma^2$ : mean-square disorder; R-factor: goodness of EXFAS fitting.

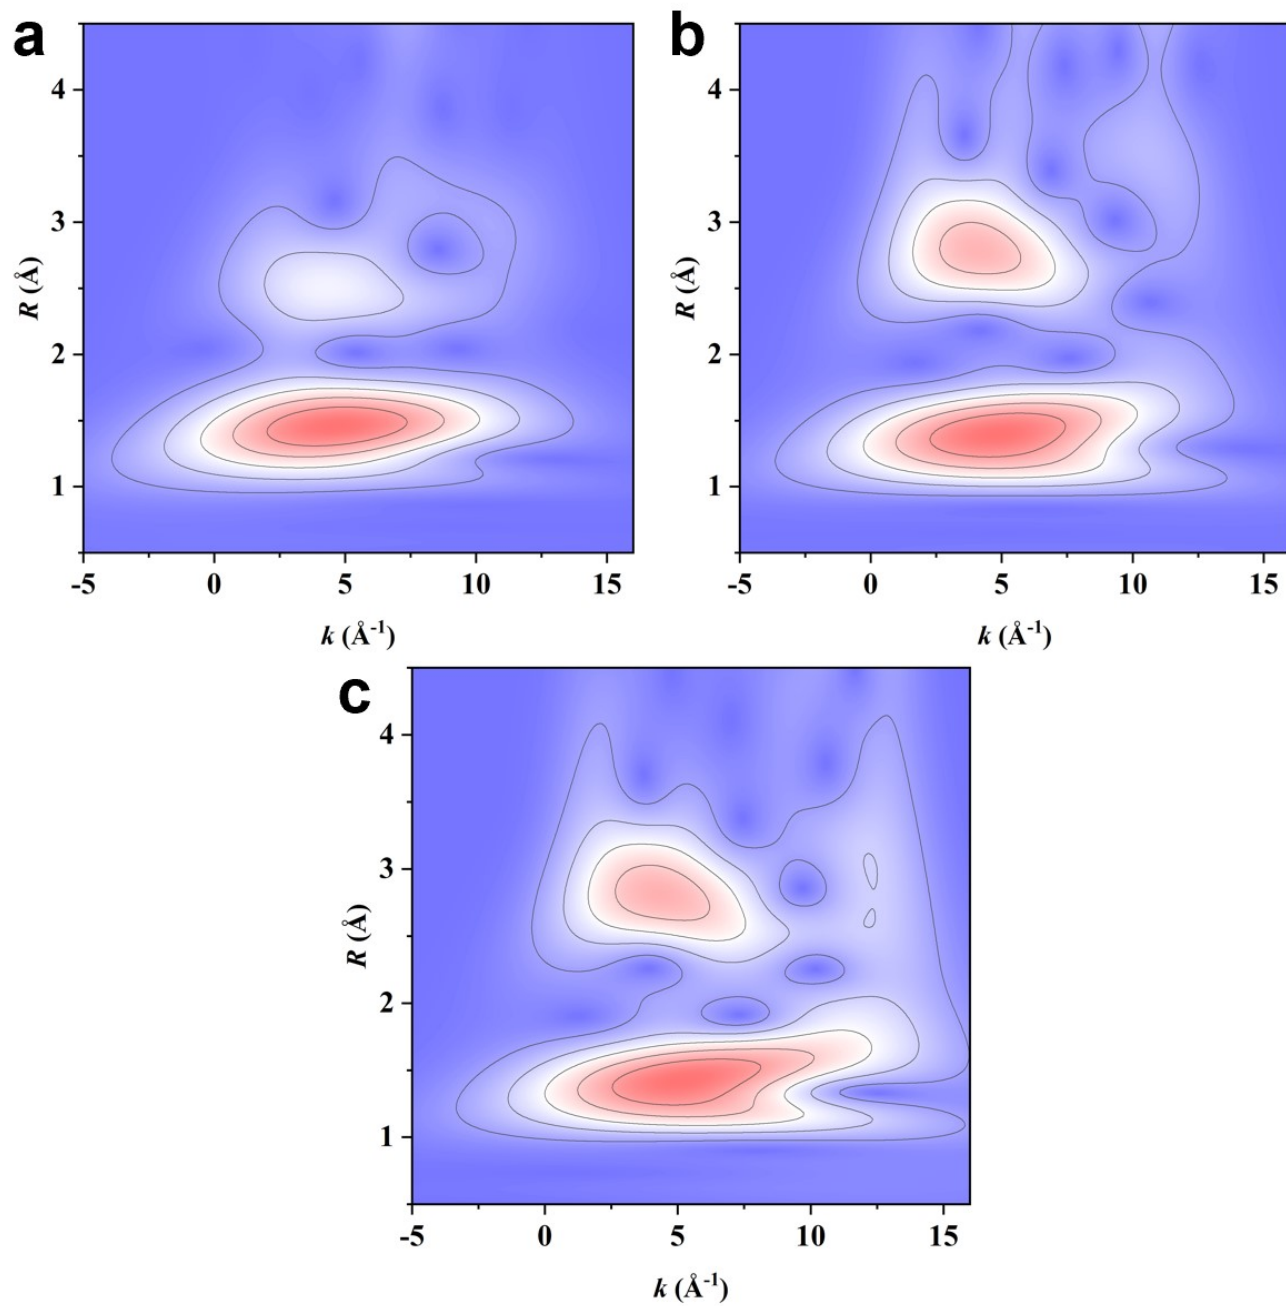

**Figure S9.** (a-c) Wavelet transforms for the  $k^3$ -weighted EXAFS signals of CuO reference (a), original  $\text{Cu}_2\text{O}$  (b), and  $\text{Cu}_2\text{O-Ar/O}_2$  (c).

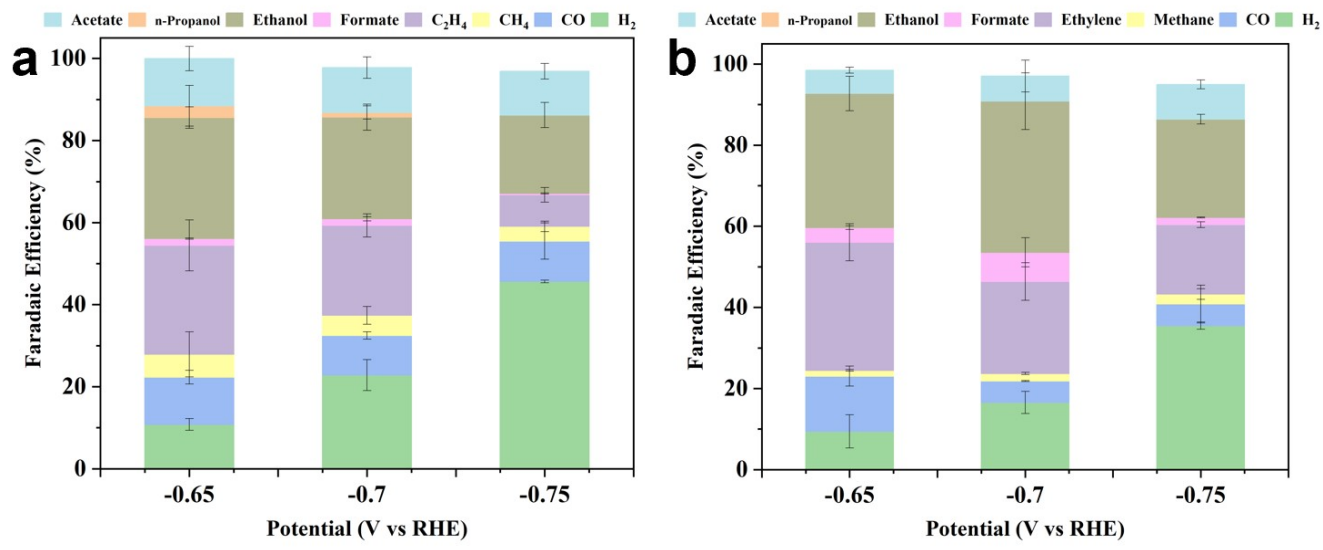

**Figure S10.** (a-b) The reduced products distribution of CO<sub>2</sub> for Cu<sub>2</sub>O (a) and Cu<sub>2</sub>O-Ar/O<sub>2</sub> (b) at different cathodic potentials under ECR.

**Table S2.** The summary of ECR performances for C<sub>2+</sub> products over various plasma-treated electrocatalysts.

| Catalysts                           | Electrolytes             | Reactor   | C <sub>2+</sub> FE (%) | Ref.      |
|-------------------------------------|--------------------------|-----------|------------------------|-----------|
| Cu <sub>2</sub> O-Ar/H <sub>2</sub> | 1M KOH                   | Flow cell | 81.2                   | This work |
| F-Cu                                | 1M KOH                   | Flow cell | 81.6                   | [1]       |
| Cu <sub>2</sub> O(CO)               | 1M KOH                   | Flow cell | 77.4                   | [2]       |
| Cu nanocube                         | 0.1M KHCO <sub>3</sub>   | H cell    | 73                     | [3]       |
| ON-CuO                              | 0.1M KHCO <sub>3</sub>   | H cell    | 77                     | [4]       |
| OD-Cu                               | 0.1M KHCO <sub>3</sub>   | H cell    | 60                     | [5]       |
| dendritic Cu                        | 0.1M KHCO <sub>3</sub>   | H cell    | 45                     | [6]       |
| Ar <sub>10min</sub> -plasma Cu      | 0.1 M CsHCO <sub>3</sub> | H cell    | 57.2                   | [7]       |
| O <sub>2,10min</sub> -plasma Cu     | 0.1 M CsHCO <sub>3</sub> | H cell    | 58.8                   | [7]       |

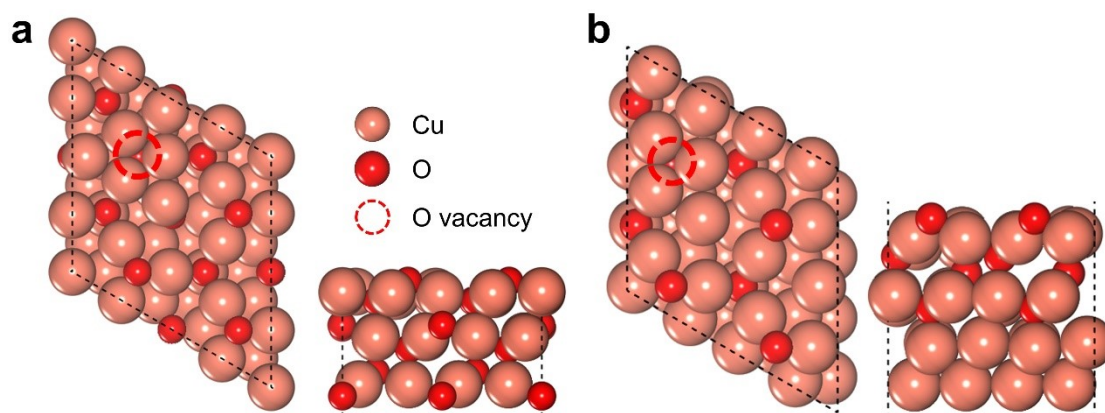

**Figure S11.** Top and side views of (a)  $\text{Cu}_2\text{O}$  and (b)  $\text{Cu}_2\text{O-Ar/H}_2$ .

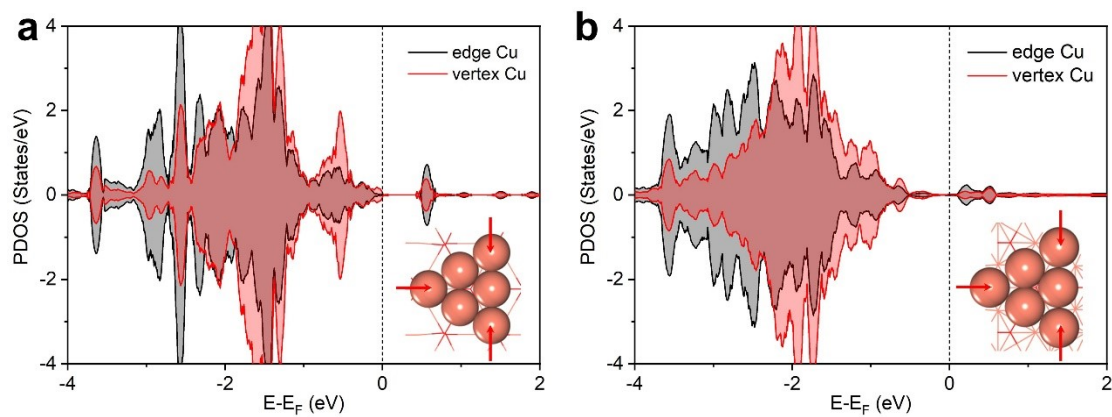

**Figure S12.** PDOS of vertex and edge Cu atoms of (a)  $\text{Cu}_2\text{O}$  and (b)  $\text{Cu}_2\text{O-Ar/H}_2$ , where red arrows denote vertex atoms.

**Table S3.** Energies ( $E$ ) and reaction energies ( $\Delta E$ ) of \*CO and \*CHO on Cu<sub>2</sub>O-Ar/H<sub>2</sub> and Cu<sub>2</sub>O with ( $E_{\text{sol}}$ ) and without ( $E_0$ ) the solvation effect.

|                            | Cu <sub>2</sub> O-Ar/H <sub>2</sub> |                       | Cu <sub>2</sub> O |                       |
|----------------------------|-------------------------------------|-----------------------|-------------------|-----------------------|
|                            | $E_0$ (eV)                          | $E_{\text{sol}}$ (eV) | $E_0$ (eV)        | $E_{\text{sol}}$ (eV) |
| $E_{*\text{CO}}$           | -366.06                             | -336.60               | -343.20           | -343.81               |
| $E_{*\text{CHO}}$          | -338.80                             | -339.37               | -346.14           | -346.78               |
| $\Delta E_{\text{CHO-CO}}$ | 0.65                                | 0.61                  | 0.44              | 0.42                  |



## Reference:

1. Zhou, Z., et al., Enhanced CO<sub>2</sub> Electroreduction to Multi-Carbon Products on Copper via Plasma Fluorination. *Adv. Sci.* 2024, 2309963.
2. Wu, Q., et al., Nanograin-Boundary-Abundant Cu<sub>2</sub>O-Cu Nanocubes with High C<sub>2</sub><sup>+</sup> Selectivity and Good Stability during Electrochemical CO<sub>2</sub> Reduction at a Current Density of 500 mA/cm<sup>2</sup>. *ACS Nano.* 2023.
3. Gao, D., et al., Plasma-activated copper nanocube catalysts for efficient carbon dioxide electroreduction to hydrocarbons and alcohols. *ACS Nano.* 2017, 11 (5), 4825-4831.
4. Park, D. G., et al., Increasing CO binding energy and defects by preserving Cu oxidation state via O<sub>2</sub>-plasma-assisted N doping on CuO enables high C<sub>2</sub><sup>+</sup> selectivity and long-term stability in electrochemical CO<sub>2</sub> reduction. *ACS Catal.* 2023, 13 (13), 9222-9233.
5. Mistry, H., et al., Highly selective plasma-activated copper catalysts for carbon dioxide reduction to ethylene. *Nat. Commun.* 2016, 7 (1), 1-9.
6. Scholten, F., et al., Plasma-modified dendritic Cu catalyst for CO<sub>2</sub> electroreduction. *ACS Catal.* 2019, 9 (6), 5496-5502.
7. Jiang, K., et al., Effects of surface roughness on the electrochemical reduction of CO<sub>2</sub> over Cu. *ACS Energy Lett.* 2020, 5 (4), 1206-1214.
